# Supplementary material for: Enhanced visible light absorption performance of SnS2and SnSe2viasurface charge transfer doping
Source: Royal Society of Chemistry journal article supplement (doi:10.1039/c8ra08834a), 2018-01-01
Supplement: c8ra08834a1.pdf [file c8ra08834a1.pdf]

## Supporting Information

### **Enhanced the Visible Light Absorption Performance of SnS<sub>2</sub> and SnSe<sub>2</sub> via Surface Charge Transfer Doping**

Feifei Xia,<sup>a\*</sup> Fengli Yang,<sup>a</sup> Jun Hu,<sup>a</sup> Chunzhi Zheng,<sup>a</sup> Haibo Yi<sup>b\*</sup> and Jianhua Sun<sup>a\*</sup>

*<sup>a</sup>School of Chemical and Environmental Engineering, Jiangsu University of Technology, Changzhou 213001, Jiangsu, P. R. China*

*<sup>b</sup>State Key Laboratory of Chemo/Biosensing and Chemometrics, College of Chemistry and Chemical Engineering, Hunan University, Changsha 410082, Hunan, P. R. China.*

E-mail: [ffxia@jsut.edu.cn](mailto:ffxia@jsut.edu.cn), [hbyi@hnu.edu.cn](mailto:hbyi@hnu.edu.cn), [sunjh@jsut.edu.cn](mailto:sunjh@jsut.edu.cn).

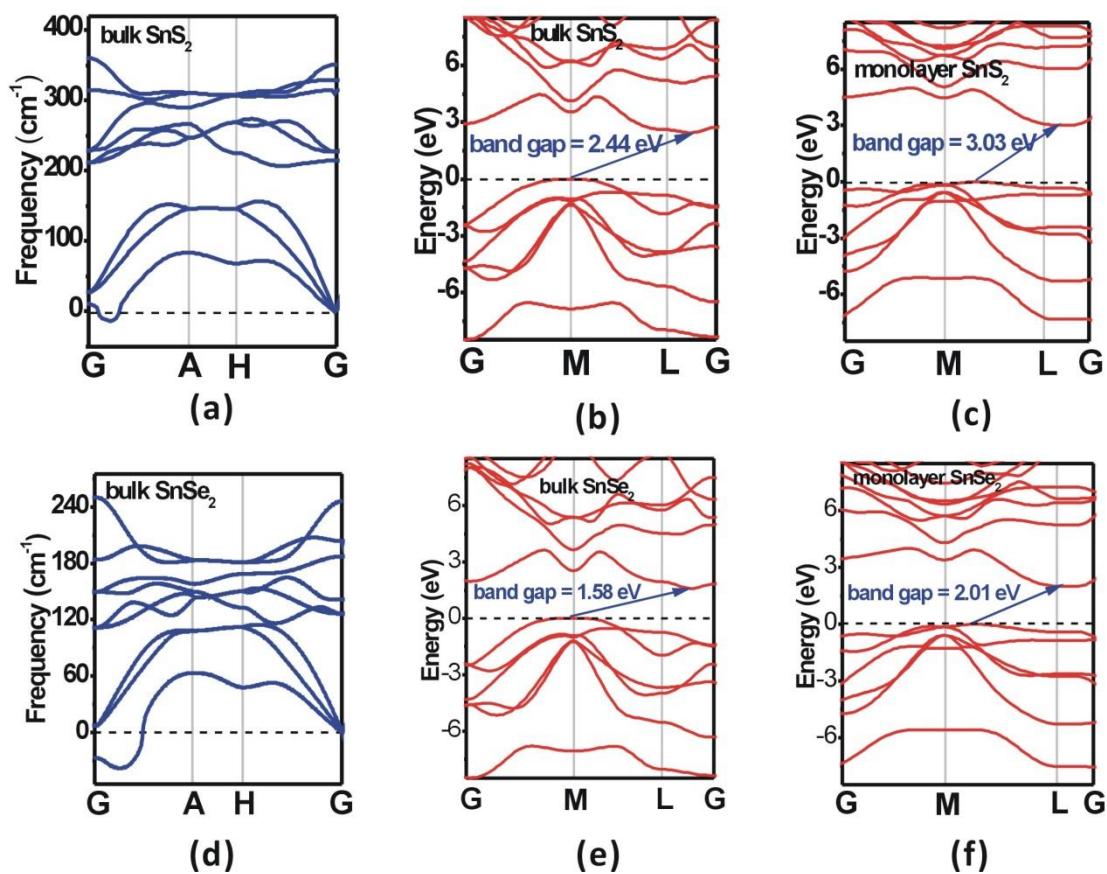

**Figure S1.** The phonon spectra of bulk (a) SnS<sub>2</sub> and (d) SnSe<sub>2</sub>, (b), (c), (e) and (f) are the band structure of bulk phase and monolayers at the HSE06 level.
